# Supplementary material
Source: ML conference proceedings conference paper supplement (https://aclanthology.org/2021.starsem-1.4)
Supplement: OptionalSupplementaryMaterial [file 2021.starsem-1.4.OptionalSupplementaryMaterial.zip]

## Appendix A. Code

### 1. Association

- a. Roget Association:
  - i. **fastText\_embedding\_Generate.ipynb**: Creates word embeddings for each book in the dataset.
  - ii. **Filter\_Global\_Embedding\_Space.ipynb**: Filters and selects the words embeddings present in both the global embedding and the local embedding.
  - iii. **/alignment/** : This directory contains the code to align each book embedding with respect to global embedding.
  - iv. **Association\_Score\_Generate.ipynb**: To generate association score for 1019 concepts across all books.
  - v. **Final Result - Roget - Association .ipynb**: Generates results for Roget association score.

### 2. Word Frequency

- a. Stopword Removal:
  - i. **fullbook\_stopword\_removal.ipynb**: Removes stopword from each book and creates a CSV with the processed dataset.
- b. LIWC:
  - i. **LIWC\_Frequency\_Distribution\_Prepare.ipynb**: Creates a CSV containing the frequency distribution of LIWC categories for each book.
  - ii. **Final Result - LIWC.ipynb**: Generates the final results with LIWC.
- c. NRC:
  - i. **NRC\_Frequency\_Distribution\_Prepare.ipynb**: Creates a CSV containing the frequency distribution of NRC categories for each book.
  - ii. **Final Result - NRC.ipynb**: Generates the final results with NRC.
- d. POS:
  - i. **POS\_Frequency\_Distribution\_Prepare.ipynb**: Creates a CSV containing the frequency distribution of POS categories for each book.
  - ii. **Final Result - POS.ipynb**: Generates the final results with POS.
- e. Roget Thesaurus:
  - i. **Roget\_Frequency\_Distribution\_Prepare.ipynb**: Creates a CSV containing the frequency distribution of Roget's categories for each book.
  - ii. **Final Result - Roget - Frequency.ipynb**: Generates the final results with Roget

## Appendix B. Dataset Links

1. Book Dataset - [https://github.com/sjmaharjan/emotion\\_flow](https://github.com/sjmaharjan/emotion_flow)
2. Roget - Roget's Thesaurus
3. LIWC - <https://liwc.wpengine.com/>
4. NRC - [NRC Emotion Lexicon](#)
